# Supplementary material
Source: PubMed Central journal article supplement (PMC2614772)
Supplement: 0806855105_0806855105SI.pdf [file 0806855105_0806855105SI.pdf]

# Supporting Information

Flores-Borja *et al.* 10.1073/pnas.0806855105

## SI Text

**Antibodies.** The following antibodies were used for flow cytometry and confocal microscopy: FITC-CTLA-4 (48815) from R&D Systems; PECy7-CD25 (BC96), PECy5-CD127 (eBioDR5), Alexa-Fluor-488-Foxp3 (PCH101), FITC-IL-2 (MQ1-17H12), Alexa-Fluor-488-IL-17A (64CAP17) from eBioscience; APC-, PE- or FITC-CD4 (RPA-T4), Biotin- or PE-CTLA-4 (BNI3.1), Biotin-CD80 (L307.4), Biotin-CD28 (CD28.2), FITC, APC-IFN- $\gamma$  (K3) from BD Bioscience; and goat anti-rabbit Alexa Fluor-647 from Invitrogen. For T lymphocyte stimulation, CD3 (HIT3a), CD28 (CD28.2), CTLA-4 (BNI3) from BD Bioscience; CTLA-4 F(ab')<sub>2</sub> (ANC152.2/8H5)

from Ancell, and goat F(ab')<sub>2</sub> anti-mouse antibodies from Sigma were used. Dynabeads M-280 Tosylactivated (DynaL Biotech) were coated with anti-CD3, anti-CD28 antibodies (10  $\mu$ g/mL each) following the manufacturer's instructions. For protein phosphorylation analysis, Alexa-Fluor-488-phospho-Y142 CD3 $\zeta$  (K25-407.69), PE-phospho-T202/Y204-ERK 1/2 (20a), and PE-phospho-Y505 Lck (4/LCKY5054G10) from BD Biosciences and Alexa Fluor-488-Ser 473 Akt (193H12) from Cell Signaling were used. For Western blot analysis, HRP-anti-phosphotyrosine (4G10) from Upstate, anti- $\beta$ -actin (Sigma), and rabbit phospho-Ser-473 Akt antibodies from Santa Cruz were used.



**Table S1. Drug treatments at time of study**

| Patient | Arthritis form | DMARD    | NSAID |
|---------|----------------|----------|-------|
| 1       | RA             | LEF      | –     |
| 2       | RA             | Gold     | +     |
| 3       | RA             | –        | +     |
| 4       | RA             | –        | –     |
| 5       | RA             | MTX      | –     |
| 6       | RA             | MTX      | –     |
| 7       | RA             | MTX      | +     |
| 8       | RA             | LEF/Pred | –     |
| 9       | RA             | Pred     | –     |
| 10      | RA             | –        | +     |
| 11      | PsA            | –        | +     |
| 12      | PsA            | MTX      | +     |
| 13      | PsA            | –        | +     |
| 14      | PsA            | AZA      | –     |
| 15      | PsA            | LEF      | –     |
| 16      | PsA            | MTX/SLZ  | –     |
| 17      | PsA            | MTX      | –     |
| 18      | PsA            | –        | +     |
| 19      | PsA            | SLZ      | +     |
| 20      | PsA            | –        | –     |

DMARD, disease-modifying antirheumatic drugs; NSAID, nonsteroidal anti-inflammatory drug; MTX, methotrexate; LEF, leflunomide; Pred, prednisolone; SLZ, sulphasalazine; AZA, Azathioprine.
